# Supplementary material for: Switching the hydrophilicity of a solute
Source: Royal Society of Chemistry journal article supplement (doi:10.1039/b821239b), 2009-01-01
Supplement: b821239b.pdf [file b821239b.pdf]

## SUPPLEMENTARY MATERIAL FOR:

# Switching the hydrophilicity of a solute

Lam Phan and Philip G. Jessop

**Figure 1.** UV/Vis spectra of **2** at different concentrations in water.

**Figure 2.** UV/Vis spectra of **1** at different concentrations in toluene.

**Figure 3.** UV/Vis spectra of **2** in a biphasic mixture of toluene and water (15 ml each), showing the spectra of the aqueous (solid) and toluene (dotted) phases.

**Figure 4.** UV/Vis spectra of **1** in a biphasic mixture of toluene and water (15 ml each), showing the spectra of the aqueous (solid) and toluene (dotted) phases.

**Figure 5.** Fluorescence excitation (300-350 nm) and emission (350-400 nm) spectra of **1** in octanol at various concentrations.

**Figure 6.** Fluorescence excitation (300-350 nm) and emission (350-400 nm) spectra of **2** in water at high concentrations.

**Figure 7.** Fluorescence excitation (300-350 nm) and emission (350-400 nm) spectra of **2** in water at low concentrations.

**Figure 8.** Fluorescence excitation and emission spectra of **1** and **2** in a biphasic mixture of octanol and water (15 ml each phase).

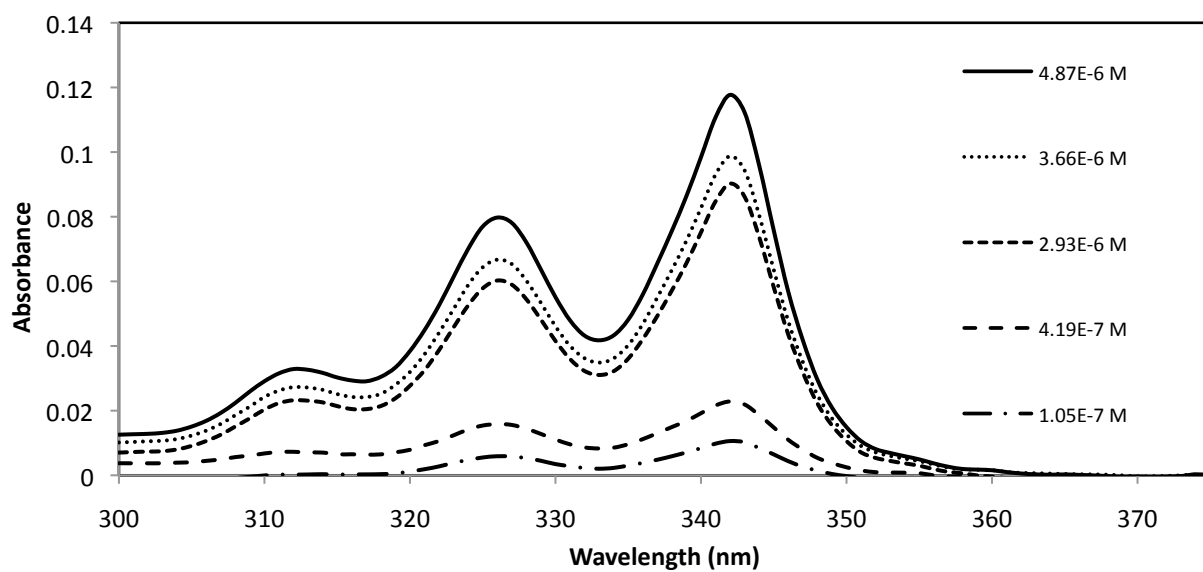

**Figure 1.** UV/Vis spectra of **2** at different concentrations in water.

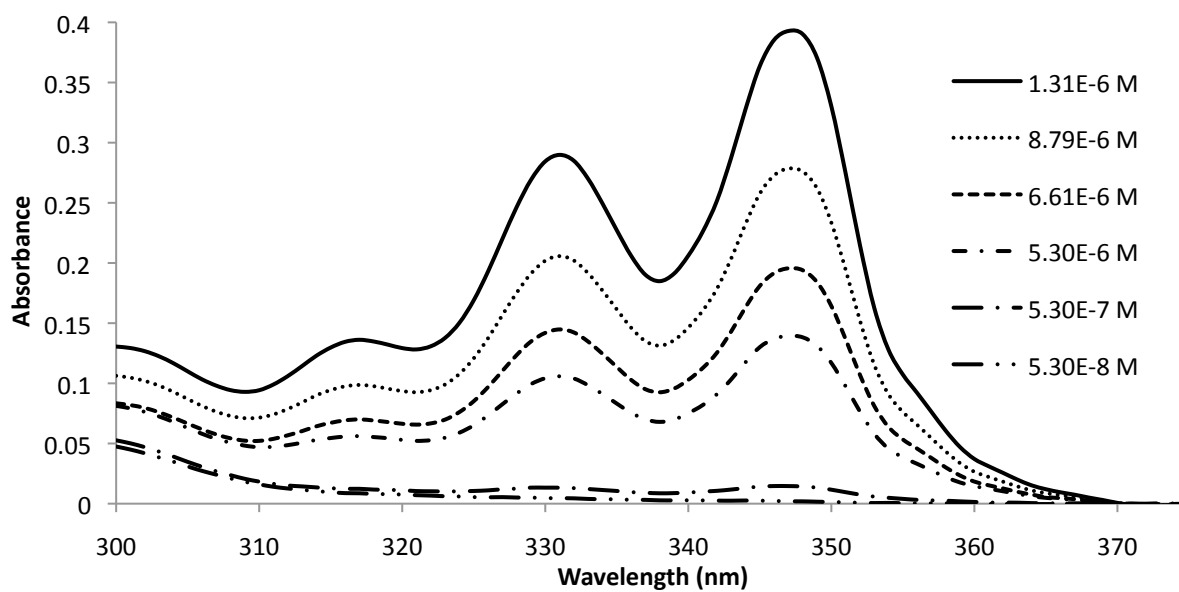

**Figure 2.** UV/Vis spectra of **1** at different concentrations in toluene.

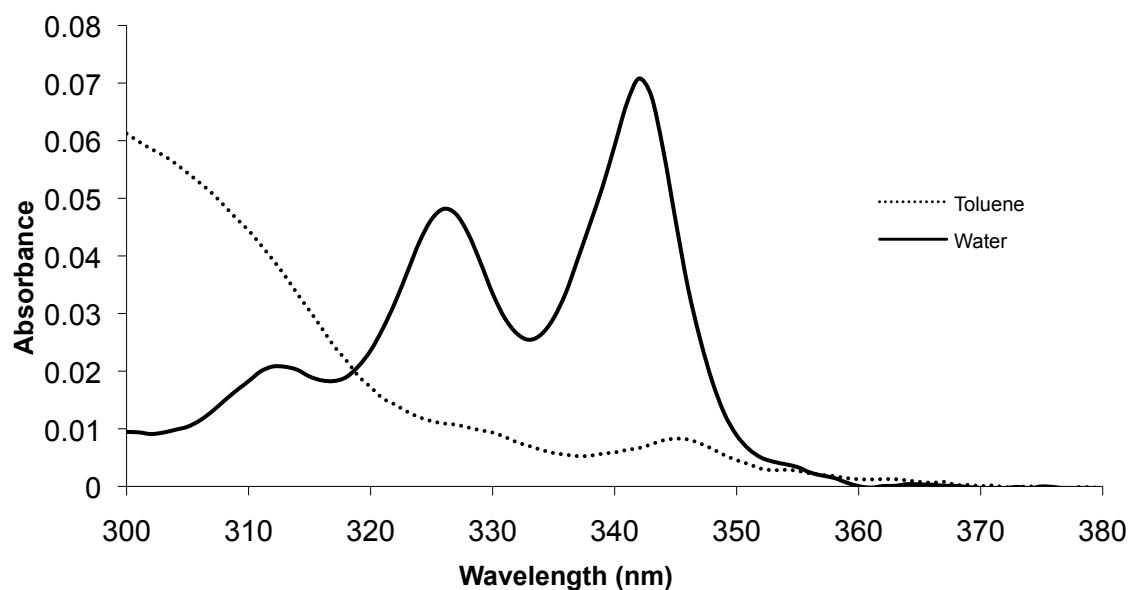

**Figure 3.** UV/Vis spectra of **2** in a biphasic mixture of toluene and water (15 ml each), showing the spectra of the aqueous (solid) and toluene (dotted) phases.

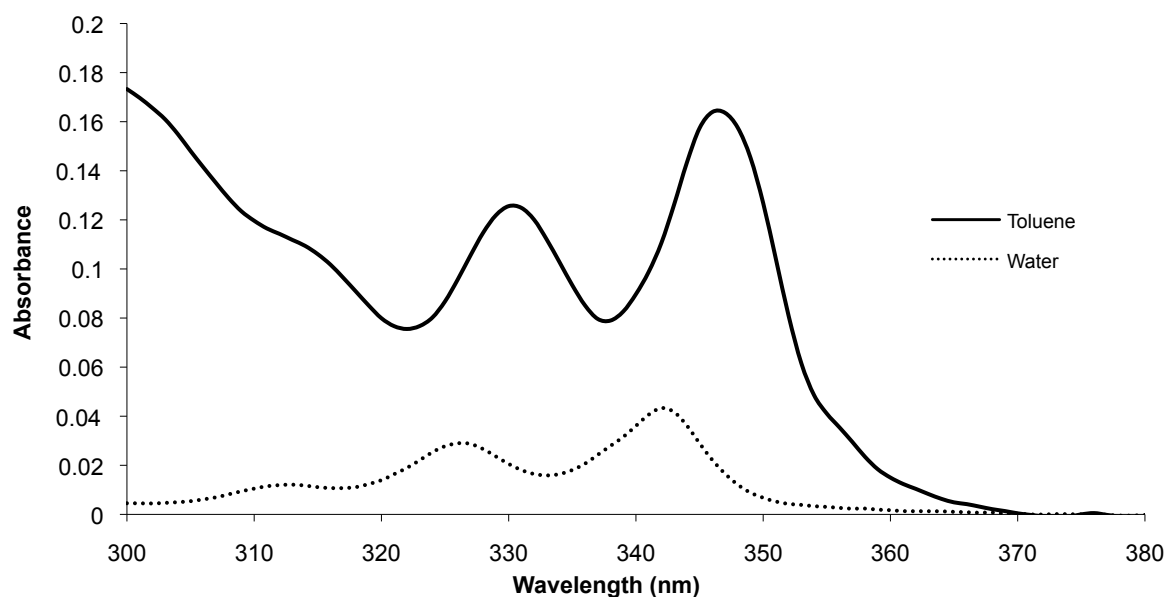

**Figure 4.** UV/Vis spectra of **1** in a biphasic mixture of toluene and water (15 ml each), showing the spectra of the aqueous (solid) and toluene (dotted) phases.

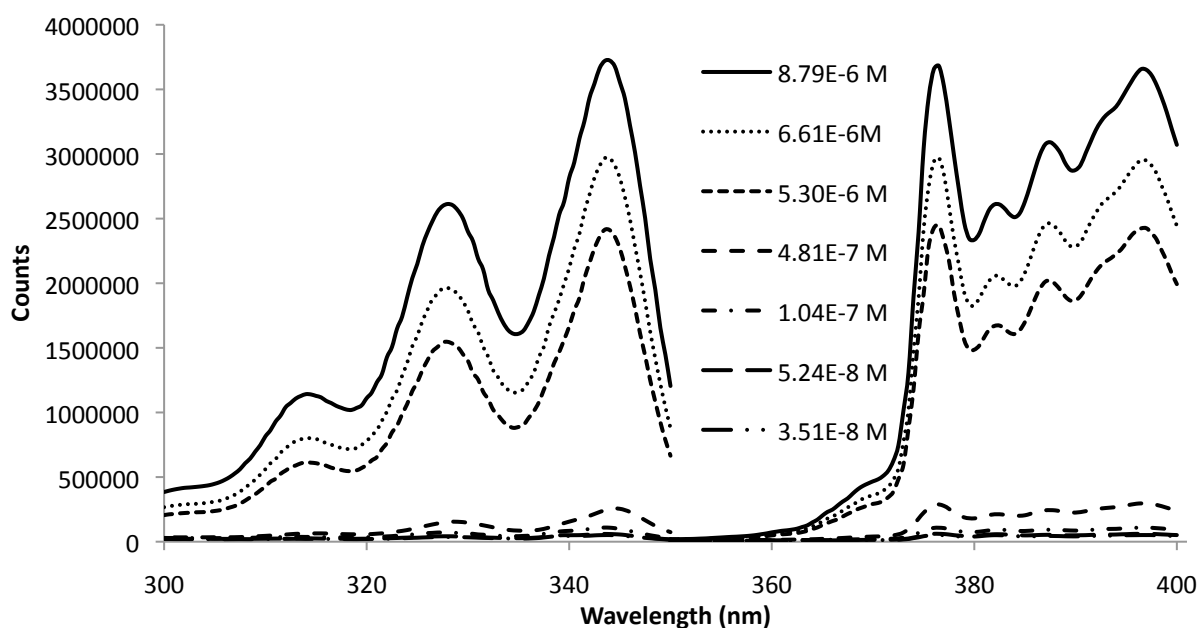

**Figure 5.** Fluorescence excitation (300-350 nm) and emission (350-400 nm) spectra of **1** in octanol at various concentrations.

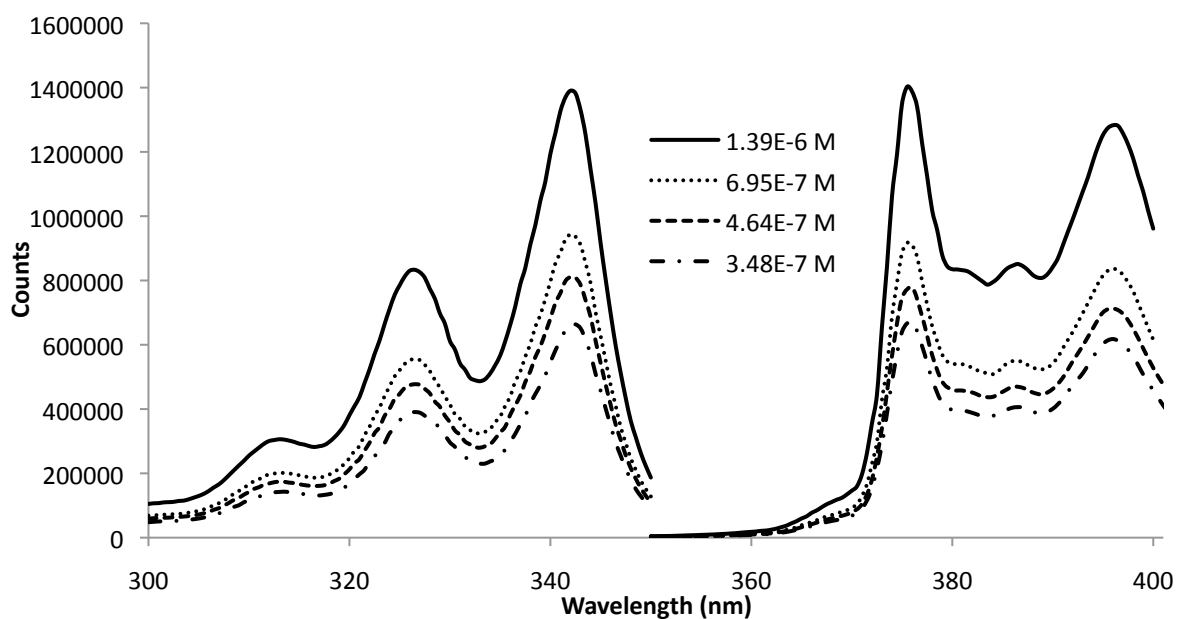

**Figure 6.** Fluorescence excitation (300-350 nm) and emission (350-400 nm) spectra of **2** in water at high concentrations.

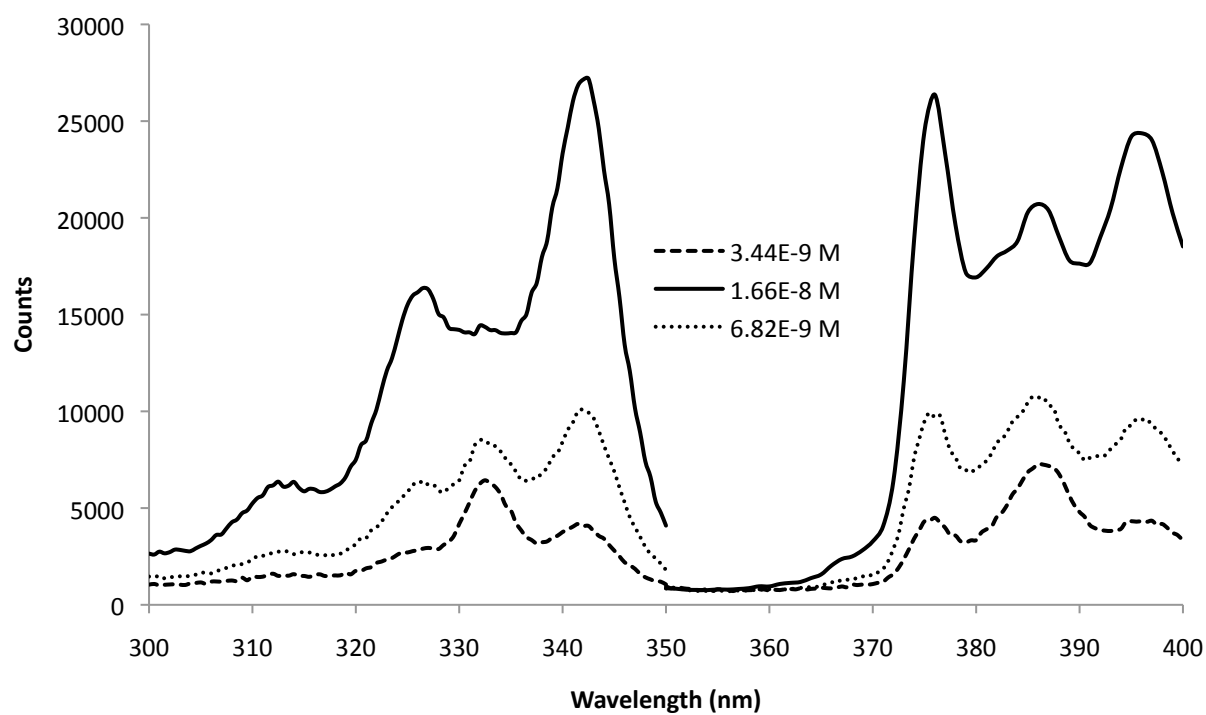

**Figure 7.** Fluorescence excitation (300-350 nm) and emission (350-400 nm) spectra of **2** in water at low concentrations.

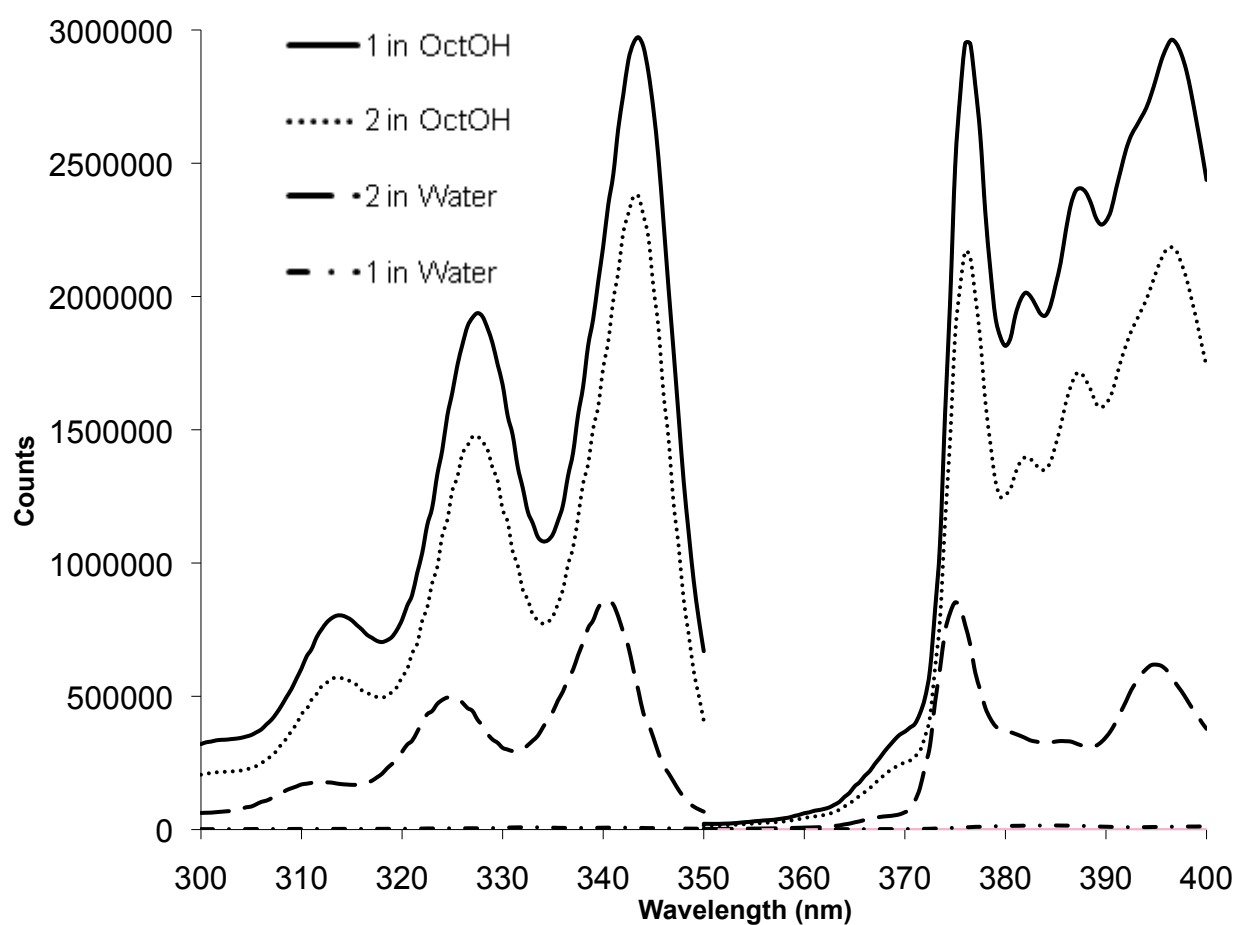

**Figure 8.** Fluorescence excitation and emission spectra of **1** and **2** in a biphasic mixture of octanol and water (15 ml each phase).
